# Supplementary material for: Estimation of prevalence of autoimmune diseases in the United States using electronic health record data
Source: JCI journal article supplement (doi:10.1172/jci178722), 2024-12-12
Supplement: sd1 [file 1]

# Supplemental Data

## Estimation of prevalence of autoimmune diseases in the United States using electronic health record data

Aaron H. Abend<sup>1§</sup>, Ingrid He<sup>1</sup>, Neil Bahroos<sup>2</sup>, Stratos Christianakis<sup>2</sup>, Ashley B. Crew<sup>3</sup>, Leanna M. Wise<sup>2</sup>, Gloria P. Lipori<sup>4</sup>, Xing He<sup>4</sup>, Shawn N. Murphy<sup>5</sup>, Christopher D. Herrick<sup>6</sup>, Jagannadha Avasarala<sup>7</sup>, Mark G. Weiner<sup>8</sup>, Jacob Zelko<sup>9</sup>, Erica Matute-Arcos<sup>1</sup>, Mark Abajian<sup>2</sup>, Philip R.O. Payne<sup>10</sup>, Albert M. Lai<sup>10</sup>, Heath A. Davis<sup>11</sup>, Asher A. Hoberg<sup>11</sup>, Chris E. Ortman<sup>11</sup>, Amit Gode<sup>12</sup>, Bradley W. Taylor<sup>12</sup>, Kristen Osinski<sup>12</sup>, Damian N. Di Florio<sup>13-15</sup>, Noel R. Rose<sup>16</sup>, Frederick W. Miller<sup>17</sup>, George C. Tsokos<sup>18</sup>, DeLisa Fairweather<sup>13,14,19§#</sup>

<sup>1</sup>Autoimmune Registry Inc., Guilford, Connecticut, USA

<sup>2</sup>Division of Bioinformatics, Department of Population and Public Health Sciences, Keck School of Medicine, University of Southern California, Los Angeles, California, USA

<sup>3</sup>Department of Dermatology, Keck School of Medicine, University of Southern California, Los Angeles, California, USA

<sup>4</sup>University of Florida Health, Gainesville, Florida, USA

<sup>5</sup>Department of Neurology, Massachusetts General Hospital, Boston, Massachusetts, USA

<sup>6</sup>Research Information Systems and Computing, Mass General Brigham, Somerville, Massachusetts, USA

<sup>7</sup>Department of Neurology, University of Kentucky Medical Center, Lexington, Kentucky, USA

<sup>8</sup>Department of Medicine, Weill Cornell Medical Center, New York, New York, USA

<sup>9</sup>Georgia Tech Research Institute, Atlanta, Georgia, USA

<sup>10</sup>Institute for Informatics, Data Science, and Biostatistics, Washington University School of Medicine, St. Louis, Missouri, USA

<sup>11</sup>Institute for Clinical and Translational Science, University of Iowa, Iowa City, Iowa, USA

<sup>12</sup>Clinical & Translational Science Institute, Medical College of Wisconsin, Milwaukee, Wisconsin, USA

<sup>13</sup>Department of Cardiovascular Medicine, Mayo Clinic, Jacksonville, Florida, USA

<sup>14</sup>Center for Clinical and Translational Science, Mayo Clinic, Rochester, Minnesota, USA

<sup>15</sup>Mayo Clinic Graduate School of Biomedical Sciences, Mayo Clinic, Rochester, Minnesota, USA

<sup>16</sup>Harvard Medical School, Boston, Massachusetts, USA

<sup>17</sup>National Institute of Environmental Health Sciences, National Institutes of Health, Research Triangle Park, North Carolina, USA

<sup>18</sup>Department of Medicine, Beth Israel Deaconess Medical Center, Boston, Massachusetts, USA

<sup>19</sup>Department of Immunology, Mayo Clinic, Jacksonville, Florida, USA

§Co-Senior authors

#Corresponding author

**Corresponding author:** Dr. DeLisa Fairweather, PhD; Department of Cardiovascular Medicine, Mayo Clinic, 4500 San Pablo Road, Jacksonville, Florida, USA; Tele: +1-904-953-6351; Email:

[Fairweather.DeLisa@mayo.edu](mailto:Fairweather.DeLisa@mayo.edu)

# Supplemental Tables

**Supplemental Table 1. List of autoimmune diseases with published prevalence<sup>a</sup>**

| Autoimmune Disease                                         | Computed Estimated US Prevalence |         |         | Female Ratio | Rate/100,000 | Published Prevalence (Reference) |
|------------------------------------------------------------|----------------------------------|---------|---------|--------------|--------------|----------------------------------|
|                                                            | Female                           | Male    | Total   |              |              |                                  |
| Acquired hemophilia                                        | < 1,000                          | 3,447   | 3,984   | < 22%        | 1.2          | 499 (1)                          |
| Acute disseminated encephalomyelitis                       | 6,129                            | 5,210   | 11,339  | 54%          | 3.4          | 1,116 (2)                        |
| Acute febrile mucocutaneous lymph node syndrome            | 11,416                           | 19,691  | 31,107  | 37%          | 9.3          | 116,321 (3)                      |
| Acute hemorrhagic leukoencephalitis                        | ND <sup>b</sup>                  | ND      | ND      | ND           | ND           | 22 (4)                           |
| Acute motor axonal neuropathy                              | ND                               | ND      | ND      | ND           | ND           | 823 (5)                          |
| Addison's disease                                          | < 1,000                          | No data | < 2,000 | ND           | ND           | 43,778(6)                        |
| Adult-onset Still's disease                                | 9,271                            | 5,440   | 14,711  | 63%          | 4.4          | 1,833 (7)                        |
| Alopecia areata                                            | 162,435                          | 108,264 | 270,699 | 60%          | 81.2         | 699,930 (8)                      |
| Anti-glomerular basement membrane nephritis                | < 1,000                          | < 1,000 | < 2,000 | ND           | 0.3          | 333 (9)                          |
| Anti-neutrophil cytoplasmic antibody-associated vasculitis | 17,622                           | 11,646  | 29,269  | 60%          | 8.8          | 222 (10)                         |
| Anti-n-methyl-D-aspartate receptor encephalitis            | ND                               | ND      | ND      | ND           | ND           | 38,329 (11)                      |
| Antiphospholipid syndrome                                  | 153,470                          | 56,316  | 209,786 | 73%          | 62.9         | 149,985 (12)                     |
| Antisynthetase syndrome                                    | ND                               | ND      | ND      | ND           | ND           | 11,665 (13)                      |
| Aplastic anemia                                            | 67,196                           | 60,836  | 128,032 | 52%          | 38.4         | 783 (14)                         |
| Atrophic gastritis                                         | 86,810                           | 38,616  | 125,427 | 69%          | 37.6         | 79,992 (15)                      |
| Autoimmune encephalitis                                    | 2,988                            | 1,762   | 4,750   | 63%          | 1.4          | 45,662 (16)                      |
| Autoimmune enteropathy                                     | ND                               | ND      | ND      | ND           | ND           | 100 (17)                         |
| Autoimmune hepatitis                                       | 150,865                          | 42,754  | 193,619 | 78%          | 58.1         | 56,327 (18)                      |
| Autoimmune inner ear disease                               | ND                               | ND      | ND      | ND           | ND           | 49,995 (19)                      |
| Autoimmune lymphoproliferative syndrome                    | 2,605                            | < 1,000 | 3,294   | < 72%        | 1            | 200 (20)                         |
| Autoimmune myocarditis                                     | ND                               | ND      | ND      | ND           | ND           | ND                               |
| Autoimmune oophoritis                                      | ND                               | ND      | ND      | ND           | ND           | 666 (21)                         |
| Autoimmune pancreatitis                                    | ND                               | ND      | ND      | ND           | ND           | 15,331 (22)                      |
| Autoimmune polyendocrine syndrome type 1                   | 2,758                            | ND      | 2,758   | 100%         | 0.8          | ND                               |

|                                                           |           |         |           |       |       |                |
|-----------------------------------------------------------|-----------|---------|-----------|-------|-------|----------------|
| Autoimmune polyendocrine syndrome type 2                  | ND        | ND      | ND        | ND    | ND    | ND             |
| Autoimmune polyendocrine syndrome type 3                  | ND        | ND      | ND        | ND    | ND    | ND             |
| Autoimmune thrombocytopenic purpura                       | 306,251   | 221,126 | 527,378   | 58%   | 158.2 | 23,331 (23)    |
| Autoimmune thyroiditis                                    | 1,536,929 | 233,615 | 1,770,544 | 87%   | 531.2 | 1,833,150 (24) |
| Autoimmune urticaria                                      | ND        | ND      | ND        | ND    | ND    | 2,666,400 (25) |
| Autoimmune uveitis                                        | 173,851   | 109,950 | 283,802   | 61%   | 85.2  | 343,965 (26)   |
| Balo concentric sclerosis                                 | < 1,000   | ND      | < 2,000   | ND    | 0.1   | ND             |
| Behcet's disease                                          | 37,237    | 15,017  | 52,255    | 71%   | 15.7  | 17,331 (27)    |
| Bickerstaff's encephalitis                                | ND        | ND      | ND        | ND    | ND    | ND             |
| Bullous pemphigoid                                        | 45,972    | 37,927  | 83,899    | 55%   | 25.2  | 86,324 (28)    |
| Celiac disease                                            | 514,965   | 190,171 | 705,137   | 73%   | 211.6 | 2,916,375 (29) |
| Chronic inflammatory demyelinating polyneuropathy         | 39,842    | 52,025  | 91,867    | 43%   | 27.6  | 11,232 (30)    |
| Cicatrical pemphigoid                                     | 20,534    | 9,960   | 30,494    | 67%   | 9.1   | 338 (31)       |
| Cogan syndrome                                            | ND        | ND      | ND        | ND    | ND    | ND             |
| Cold autoimmune hemolytic anemia                          | 5,823     | 3,907   | 9,730     | 60%   | 2.9   | 5,399 (32)     |
| Crohn's disease                                           | 620,625   | 490,064 | 1,110,689 | 56%   | 333.3 | 2,282,271 (33) |
| Cryptogenic organizing pneumonia                          | 14,787    | 12,718  | 27,506    | 54%   | 8.3   | 3,666 (34)     |
| Cutaneous lupus erythematosus                             | 72,482    | 10,420  | 82,903    | 87%   | 24.9  | 253,308 (35)   |
| Dermatitis herpetiformis                                  | 6,589     | 7,662   | 14,251    | 46%   | 4.3   | 31,163 (36)    |
| Dermatomyositis                                           | 108,264   | 30,418  | 138,682   | 78%   | 41.6  | 71,392 (37)    |
| Encephalopathy Associated with Autoimmune Thyroid Disease | ND        | ND      | ND        | ND    | ND    | 6,999 (38)     |
| Enthesitis-related arthritis                              | 45,282    | 35,168  | 80,451    | 56%   | 24.1  | ND             |
| Epidermolysis bullosa acquisita                           | < 1,000   | < 1,000 | < 2,000   | ND    | 0.1   | 96 (39)        |
| Episcleritis                                              | 40,149    | 15,553  | 55,703    | 72%   | 16.7  | 175,315 (40)   |
| Essential mixed cryoglobulinemia                          | 8,504     | 6,129   | 14,634    | 58%   | 4.4   | ND             |
| Evans syndrome                                            | 5,746     | 6,895   | 12,642    | 45%   | 3.8   | 71,992 (5)     |
| Felty syndrome                                            | 2,758     | < 1,000 | 3,218     | < 73% | 1     | 33,330 (41)    |
| Gestational pemphigoid                                    | 3,984     | ND      | 3,984     | 100%  | 1.2   | 100 (42)       |
| Giant cell arteritis                                      | 126,347   | 54,553  | 180,900   | 70%   | 54.3  | 235,143 (43)   |
| Granulomatosis with polyangiitis                          | 88,726    | 59,150  | 147,877   | 60%   | 44.4  | 53,328 (44)    |
| Graves' disease                                           | 1,125,937 | 314,067 | 1,440,004 | 78%   | 432.1 | 2,096,457 (45) |

|                                             |           |           |           |     |       |                 |
|---------------------------------------------|-----------|-----------|-----------|-----|-------|-----------------|
| Graves' ophthalmopathy                      | ND        | < 1,000   | < 2,000   | ND  | ND    | 298,959 (46)    |
| Guillain-Barré syndrome                     | 39,842    | 39,919    | 79,761    | 50% | 23.9  | 5,466 (47)      |
| IgA nephropathy                             | < 1,000   | ND        | < 2,000   | ND  | ND    | 12,665 (48)     |
| Immunoglobulin A vasculitis                 | 21,836    | 20,381    | 42,217    | 52% | 12.7  | 15,034 (49)     |
| Immunoglobulin G4 related disease           | ND        | ND        | ND        | ND  | ND    | 2,666 (50)      |
| Inclusion body myositis                     | 11,646    | 18,695    | 30,341    | 38% | 9.1   | 3,333 (51)      |
| Intermediate uveitis                        | ND        | ND        | ND        | ND  | ND    | 5,666 (14)      |
| Juvenile arthritis                          | 184,272   | 67,732    | 252,004   | 73% | 75.6  | 33,041 (52)     |
| Juvenile dermatomyositis                    | 7,662     | 2,068     | 9,730     | 79% | 2.9   | 7,332 (37)      |
| Lambert-Eaton myasthenic syndrome           | 2,911     | 1,302     | 4,214     | 69% | 1.3   | 983 (53)        |
| Lichen sclerosus                            | 311,002   | 14,481    | 325,483   | 96% | 97.7  | 166,650 (54)    |
| Linear IgA disease                          | < 1,000   | ND        | < 2,000   | ND  | ND    | 466 (55)        |
| Lupus nephritis                             | 114,854   | 21,530    | 136,384   | 84% | 40.9  | 70,801 (56)     |
| Lupus vasculitis                            | ND        | ND        | ND        | ND  | ND    | 26,855 (57)     |
| Microscopic polyangiitis                    | 9,041     | 2,911     | 11,952    | 76% | 3.6   | 31,163 (44)     |
| Mixed connective tissue disease             | < 1,000   | ND        | < 2,000   | ND  | ND    | 9,853 (58)      |
| Multiple sclerosis                          | 1,017,672 | 348,393   | 1,366,065 | 74% | 409.9 | 801,496 (59)    |
| Myasthenia gravis                           | 58,154    | 55,396    | 113,551   | 51% | 34.1  | 58,327 (60)     |
| Myelin oligodendrocyte glycoprotein disease | ND        | ND        | ND        | ND  | ND    | 8,365 (61)      |
| Narcolepsy with cataplexy                   | 48,117    | 25,054    | 73,172    | 66% | 22    | 46,662 (62)     |
| Necrotizing vasculitis                      | 14,940    | 5,286     | 20,227    | 74% | 6.1   | 14,998 (63)     |
| Neuromyelitis optica                        | 32,716    | 10,037    | 42,754    | 77% | 12.8  | 8,199 (64)      |
| Neuromyotonia                               | ND        | ND        | ND        | ND  | ND    | ND              |
| Opsoclonus myoclonus syndrome               | ND        | ND        | ND        | ND  | ND    | 24 (65)         |
| Paraneoplastic cerebellar degeneration      | ND        | ND        | ND        | ND  | ND    | 4,078 (66)      |
| Pemphigus vulgaris                          | 39,459    | 27,889    | 67,349    | 59% | 20.2  | 17,164 (67)     |
| Pernicious anemia                           | 40,608    | 16,626    | 57,235    | 71% | 17.2  | 1,645,668 (68)  |
| Polymyalgia rheumatica                      | 413,826   | 251,314   | 665,141   | 62% | 199.6 | 793,820 (43)    |
| Polymyositis                                | 44,976    | 20,840    | 65,816    | 68% | 19.7  | 44,995 (69)     |
| Post-myocardial infarction syndrome         | 1,225     | 1,609     | 2,834     | 43% | 0.9   | 89,000 (70)     |
| Primary biliary cholangitis                 | 110,793   | 15,094    | 125,887   | 88% | 37.8  | 97,656 (71)     |
| Primary sclerosing cholangitis              | 23,905    | 33,559    | 57,465    | 42% | 17.2  | 20,281 (72)     |
| Psoriasis                                   | 1,290,977 | 1,047,707 | 2,338,685 | 55% | 701.7 | 10,498,950 (73) |

|                                  |           |         |           |     |       |                |
|----------------------------------|-----------|---------|-----------|-----|-------|----------------|
| Pure red cell aplasia            | 4,290     | 4,597   | 8,887     | 48% | 2.7   | ND             |
| Rasmussen disease                | ND        | ND      | ND        | ND  | ND    | ND             |
| Reactive arthritis               | 9,500     | 11,646  | 21,147    | 45% | 6.3   | 307,135 (74)   |
| Relapsing polychondritis         | 12,795    | 4,827   | 17,622    | 73% | 5.3   | 1,166 (75)     |
| Rheumatic fever                  | 7,968     | 3,447   | 11,416    | 70% | 3.4   | 16,665 (76)    |
| Rheumatoid arthritis             | 1,709,171 | 445,164 | 2,154,336 | 79% | 646.4 | 1,866,480 (77) |
| Rheumatoid vasculitis            | 9,730     | 1,149   | 10,880    | 89% | 3.3   | 984,901 (78)   |
| Sjögren's disease                | 628,134   | 66,966  | 695,100   | 90% | 208.6 | 966,570 (79)   |
| Stiff person syndrome            | 12,948    | 6,895   | 19,844    | 65% | 6     | 333 (80)       |
| Sympathetic ophthalmia           | < 1,000   | < 1,000 | < 2,000   | ND  | 0.4   | 99 (81)        |
| Systemic lupus erythematosus     | 988,326   | 114,241 | 1,102,567 | 90% | 330.8 | 243,808 (82)   |
| Systemic scleroderma             | 194,998   | 35,934  | 230,933   | 84% | 69.3  | 74,992 (83)    |
| Transverse myelitis              | 16,166    | 9,117   | 25,284    | 64% | 7.6   | 8,199 (84)     |
| Type 1 diabetes mellitus         | 715,788   | 634,263 | 1,350,051 | 53% | 405.1 | 999,900 (85)   |
| Ulcerative colitis               | 502,246   | 421,795 | 924,042   | 54% | 277.3 | 1,867,313 (33) |
| Vitiligo                         | 159,906   | 130,714 | 290,621   | 55% | 87.2  | 499,950 (86)   |
| Vogt–Koyanagi–Harada syndrome    | 7,355     | 2,681   | 10,037    | 73% | 3     | 1,249 (87)     |
| Warm autoimmune hemolytic anemia | 70,337    | 50,799  | 121,136   | 58% | 36.3  | 39,996 (24)    |

<sup>a</sup> Data from Mass General Brigham, University Florida/Shands and University of Southern California

<sup>b</sup> ND, no data- no published papers available or too few patients (less than 20 patients with the condition from the 3 sites) to be able to determine prevalence.

**Supplemental Table 2. Prevalence of diseases considered but not included in the analysis due to inadequate evidence of autoimmune disease**

| Disease                                    | Computed Estimated US Prevalence |           |           | Female Ratio | Rate/100,000 | Published Prevalence (Reference) |
|--------------------------------------------|----------------------------------|-----------|-----------|--------------|--------------|----------------------------------|
|                                            | Female                           | Male      | Total     |              |              |                                  |
| Adipositis dolorosa                        | ND <sup>b</sup>                  | ND        | ND        | ND           | ND           | ND (88)                          |
| Age related macular degeneration           | 326,939                          | 202,584   | 529,523   | 62%          | 158.9        | ND                               |
| Ankylosing spondylitis                     | 120,140                          | 182,433   | 302,574   | 40%          | 90.8         | 866,580 (89)                     |
| Anti-sperm antibodies                      | ND                               | ND        | ND        | ND           | ND           | ND                               |
| Autoimmune angioedema                      | ND                               | ND        | ND        | ND           | ND           | 1,999 (90)                       |
| Autoimmune neutropenia                     | ND                               | ND        | ND        | ND           | ND           | 1,666 (91)                       |
| Autoimmune orchitis                        | ND                               | ND        | ND        | ND           | ND           | ND                               |
| Autoimmune progesterone dermatitis         | ND                               | ND        | ND        | ND           | ND           | ND                               |
| Autoimmune retinopathy                     | ND                               | ND        | ND        | ND           | ND           | ND                               |
| Brachial neuropathy                        | 442,942                          | 286,253   | 729,196   | 61%          | 218.8        | 5,466 (92)                       |
| Chronic lyme disease                       | 202,201                          | 153,470   | 355,672   | 57%          | 106.7        | ND                               |
| Chronic recurring multifocal osteomyelitis | 12,565                           | 17,316    | 29,881    | 42%          | 9.0          | 333 (93)                         |
| Complex regional pain syndrome             | 153,700                          | 51,565    | 205,266   | 75%          | 61.6         | 68,559 (94)                      |
| Cutaneous mastocytosis                     | 17,699                           | 11,263    | 28,962    | 61%          | 8.7          | 33,330 (95)                      |
| Endometriosis                              | 1,001,352                        | < 1,000   | 1,001,505 | N/A          | 300.5        | 806,250 (96)                     |
| Eosinophilic esophagitis                   | 154,236                          | 259,743   | 413,980   | 37%          | 124.2        | 111,655 (97)                     |
| Eosinophilic fasciitis                     | 4,980                            | 2,528     | 7,508     | 66%          | 2.3          | 5,166 (98)                       |
| Epilepsy                                   | 1,839,886                        | 1,661,054 | 3,500,940 | 53%          | 1,050.4      | ND                               |
| Erythema nodosum                           | 36,241                           | 6,053     | 42,294    | 86%          | 12.7         | 9,999 (99)                       |
| Fibromyalgia                               | 1,704,727                        | 106,732   | 1,811,460 | 94%          | 543.5        | 5,816,085 (100)                  |
| Hidradenitis suppurativa                   | 309,776                          | 88,419    | 398,196   | 78%          | 119.5        | 2,283,105 (101)                  |
| Idiopathic pulmonary fibrosis              | 68,651                           | 123,971   | 192,623   | 36%          | 57.8         | 1,161,050 (102)                  |
| Interstitial cystitis                      | 194,692                          | 17,929    | 212,621   | 92%          | 63.8         | 55,161 (103)                     |
| Lichen planus                              | 188,409                          | 61,066    | 249,476   | 76%          | 74.9         | ND                               |
| Ligneous conjunctivitis                    | ND                               | < 1,000   | < 2,000   | ND           | ND           | ND                               |
| Microscopic colitis                        | 40,762                           | 11,569    | 52,331    | 78%          | 15.7         | 343,299 (104)                    |
| Mooren's ulcer                             | < 1,000                          | < 1,000   | < 2,000   | ND           | 0.2          | ND                               |
| Morphea                                    | 107,038                          | 12,029    | 119,068   | 90%          | 35.7         | 5,166 (105)                      |

|                                                                              |           |         |           |       |       |                  |
|------------------------------------------------------------------------------|-----------|---------|-----------|-------|-------|------------------|
| Myalgic encephalomyelitis                                                    | 1,324,843 | 586,835 | 1,911,679 | 69%   | 573.6 | 7,599,240 (106)  |
| Myositis                                                                     | 397,966   | 114,011 | 511,977   | 78%   | 153.6 | 47,161 (107)     |
| Palindromic rheumatism                                                       | 12,412    | 6,206   | 18,618    | 67%   | 5.6   | ND               |
| Paroxysmal nocturnal hemoglobinuria                                          | 7,815     | 6,359   | 14,174    | 55%   | 4.3   | 416 (108)        |
| Parry Romberg syndrome                                                       | ND        | ND      | ND        | ND    | ND    | 476 (109)        |
| Pediatric autoimmune neuropsychiatric disorder associated with streptococcus | ND        | ND      | ND        | ND    | ND    | 370,000 (110)    |
| Pityriasis lichenoides et varioliformis acuta                                | 3,984     | < 1,000 | 4,903     | < 80% | 1.5   | 101,729          |
| POEMS syndrome                                                               | < 1,000   | ND      | < 2,000   | ND    | ND    | 999 (111)        |
| Polyarteritis nodosa                                                         | 15,477    | 10,650  | 26,127    | 59%   | 7.8   | 533 (112)        |
| Post-acute sequelae of COVID-19                                              | ND        | ND      | ND        | ND    | ND    | ND               |
| Primary idiopathic dilated cardiomyopathy                                    | ND        | ND      | ND        | ND    | ND    | 121,654 (113)    |
| Psoriatic arthritis                                                          | 1,302     | 1,072   | 2,375     | 55%   | 0.7   | 516,615 (114)    |
| Pyoderma gangrenosum                                                         | 28,809    | 11,033  | 39,842    | 72%   | 12.0  | 19,498 (115)     |
| Restless leg syndrome                                                        | 993,996   | 517,264 | 1,511,261 | 66%   | 453.4 | 54,994,500 (116) |
| Retinocochleocerebral vasculopathy                                           | ND        | ND      | ND        | ND    | ND    | ND               |
| Retroperitoneal fibrosis                                                     | ND        | ND      | ND        | ND    | ND    | 4,666 (117)      |
| Rheumatic chorea                                                             | < 1,000   | < 1,000 | 1,072     | ND    | 0.3   | ND               |
| Sarcoidosis                                                                  | 350,615   | 255,758 | 606,374   | 58%   | 181.9 | 198,680 (118)    |
| Schnitzler syndrome                                                          | ND        | < 1,000 | < 2,000   | ND    | ND    | 300 (119)        |
| Scleritis                                                                    | 88,113    | 38,923  | 127,036   | 69%   | 38.1  | 17,331 (40)      |
| Secondary Raynaud's phenomenon                                               | 15,707    | 1,302   | 17,009    | 92%   | 5.1   | 17,981,535 (120) |
| Subacute bacterial endocarditis                                              | 7,508     | 10,803  | 18,312    | 41%   | 5.5   | 21,664 (121)     |
| Systemic mast cell disease                                                   | 164,657   | 34,938  | 199,596   | 82%   | 59.9  | ND               |
| Takayasu arteritis                                                           | 19,308    | 3,064   | 22,373    | 86%   | 6.7   | 1,566 (122)      |
| Tolosa-Hunt syndrome                                                         | ND        | ND      | ND        | ND    | ND    | 300 (123)        |
| Undifferentiated connective tissue disease                                   | 153       | ND      | < 2,000   | ND    | ND    | 256,641 (124)    |

<sup>a</sup> Data from Mass General Brigham, University Florida/Shands and University of Southern California

<sup>b</sup> ND, no data- no published papers available or too few patients (less than 20 patients with the condition from the 3 sites) to be able to determine prevalence.

**Supplemental Table 3. US Census population in 2022**

| US Census Population in 2022 |                    |                    |                    |
|------------------------------|--------------------|--------------------|--------------------|
| Age                          | Female             | Male               | Total              |
| 0-17                         | 35,271,925         | 37,053,677         | 72,325,602         |
| 18-44                        | 59,242,372         | 61,293,359         | 120,535,731        |
| 45-64                        | 41,647,380         | 40,956,534         | 82,603,914         |
| ≥65                          | 31,897,671         | 25,924,644         | 57,822,315         |
| <b>Total</b>                 | <b>168,059,348</b> | <b>165,228,214</b> | <b>333,287,562</b> |

**Supplemental Table 4. Number of patients with one or more autoimmune diseases**

| Number of Autoimmune Diseases | USC <sup>a</sup> | UF            | MGB            | WUSL           | UI            | MCW           | Total          | Percent |
|-------------------------------|------------------|---------------|----------------|----------------|---------------|---------------|----------------|---------|
| <b>1</b>                      | 10,894           | 32,031        | 110,401        | 121,782        | 43,049        | 61,267        | 379,424        | 65%     |
| <b>2</b>                      | 8,629            | 21,893        | 30,425         | 43,771         | 21,368        | 15,591        | 141,677        | 24%     |
| <b>3</b>                      | 4,539            | 9,982         | 7,293          | 10,723         | 9,015         | 3,794         | 45,346         | 8%      |
| <b>4+</b>                     | 1,958            | 2,182         | 2,784          | 4,580          | 692           | 1,510         | 13,706         | 2%      |
| <b>Total</b>                  | <b>26,020</b>    | <b>66,088</b> | <b>150,903</b> | <b>180,856</b> | <b>74,124</b> | <b>82,162</b> | <b>580,153</b> |         |

<sup>a</sup>Abbreviations: MCW, Medical College of Wisconsin; MGB, Mass General Brigham; UF, University Florida/Shands; UI, University of Iowa; USC, University of Southern California; WUSL, University of Washington at St. Louis

**Supplementary Table 5. Analysis of diagnosis code frequency (numerator) and timing (denominator)**

| Autoimmune Disease                       | 0 days        | 1 day         | 7 days        | 30 days       | 90 days      | 365 days     | 30 vs. 0 days <sup>a</sup> |
|------------------------------------------|---------------|---------------|---------------|---------------|--------------|--------------|----------------------------|
| Antiphospholipid syndrome (hematologic)  | 739           | 418           | 396           | 359           | 320          | 208          | 51%                        |
| Crohn's disease (digestive)              | 1,898         | 1,210         | 1,125         | 1,023         | 900          | 659          | 46%                        |
| Multiple sclerosis (neurologic)          | 4,035         | 3,097         | 2,953         | 2,786         | 2,594        | 2,107        | 31%                        |
| Rheumatoid arthritis (connective tissue) | 8,101         | 4,915         | 4,676         | 4,314         | 3,831        | 2,811        | 47%                        |
| Systemic lupus erythematosus (systemic)  | 4,691         | 2,970         | 2,845         | 2,638         | 2,347        | 1,703        | 44%                        |
| Vitiligo (skin)                          | 883           | 538           | 479           | 413           | 368          | 244          | 53%                        |
| <b>Any of these 6 diseases</b>           | <b>18,498</b> | <b>12,354</b> | <b>11,723</b> | <b>10,857</b> | <b>9,777</b> | <b>7,370</b> | <b>41%</b>                 |

<sup>a</sup>This column shows the ratio that a 0-day algorithm overstates the number of cases compared to the 30-day algorithm for each disease.

**Supplementary Table 6. Date-window sensitivity analysis (USC data)<sup>a</sup>**

**Date-window: 0**

| Age          | Autoimmune Disease Counts/ Denominators (%) |                       | Projected Prevalence <sup>a</sup> |                  |                           |
|--------------|---------------------------------------------|-----------------------|-----------------------------------|------------------|---------------------------|
|              | Female                                      | Male                  | Female                            | Male             | Total                     |
| 0-17         | 73/9,439 (0.77%)                            | 85/10,604 (0.80%)     | 272,788                           | 297,016          | 569,805                   |
| 18-44        | 8,042/91,017 (8.84%)                        | 4,323/76,816 (5.63%)  | 5,234,485                         | 3,449,427        | 8,683,912                 |
| 45-64        | 11,317/87,591 (12.92%)                      | 5,922/79,350 (7.46%)  | 5,380,957                         | 3,056,643        | 8,437,600                 |
| ≥65          | 13,235/111,661 (11.85%)                     | 7,940/113,471 (7.00%) | 3,780,780                         | 1,814,047        | 5,594,827                 |
| <b>Total</b> |                                             |                       | <b>14,669,011</b>                 | <b>8,617,133</b> | <b>23,286,144 (6.99%)</b> |

**Date-window: 30**

| Age          | Autoimmune Disease Counts/ Denominators (%) |                      | Projected Prevalence <sup>a</sup> |                  |                           |
|--------------|---------------------------------------------|----------------------|-----------------------------------|------------------|---------------------------|
|              | Female                                      | Male                 | Female                            | Male             | Total                     |
| 0-17         | 18/3,571 (0.05%)                            | 23/4,098 (0.06%)     | 177,792                           | 207,964          | 385,755                   |
| 18-44        | 4,542/53,306 (8.52%)                        | 2,350/43,826 (5.36%) | 5,047,816                         | 3,286,620        | 8,334,435                 |
| 45-64        | 6,351/58,371 (10.88%)                       | 3,025/52,288 (5.79%) | 4,531,403                         | 2,369,445        | 6,900,847                 |
| ≥65          | 7,189/78,373 (9.17%)                        | 3,712/80,614 (4.61%) | 2,925,910                         | 1,193,742        | 4,119,652                 |
| <b>Total</b> |                                             |                      | <b>12,682,920</b>                 | <b>7,057,769</b> | <b>19,740,690 (5.92%)</b> |

**Date-window: 60**

| Age          | Autoimmune Disease Counts/ Denominators (%) |                       | Projected Prevalence <sup>a</sup> |                  |                           |
|--------------|---------------------------------------------|-----------------------|-----------------------------------|------------------|---------------------------|
|              | Female                                      | Male                  | Female                            | Male             | Total                     |
| 0-17         | 18/3,254 (0.06%)                            | 19/3,733 (0.05%)      | 195,112                           | 188,594          | 383,706                   |
| 18-44        | 4,219 /47,914 (8.81%)                       | 2,146 /38,725 (5.54%) | 5,216,504                         | 3,396,657        | 8,613,161                 |
| 45-64        | 5,948 /53,665 (11.08%)                      | 2,786 /47,337 (5.89%) | 4,616,018                         | 2,410,480        | 7,026,498                 |
| ≥65          | 6,691 /72,130 (9.28%)                       | 3,400 /73,695 (4.61%) | 2,958,926                         | 1,196,062        | 4,154,988                 |
| <b>Total</b> |                                             |                       | <b>12,986,560</b>                 | <b>7,191,793</b> | <b>20,178,353 (6.05%)</b> |

**Date-window: 90**

| Age          | Autoimmune Disease Counts/ Denominators (%) |                       | Projected Prevalence <sup>a</sup> |                  |                           |
|--------------|---------------------------------------------|-----------------------|-----------------------------------|------------------|---------------------------|
|              | Female                                      | Male                  | Female                            | Male             | Total                     |
| 0-17         | 17/3,071 (0.06%)                            | 19/3,526 (0.05%)      | 195,253                           | 199,665          | 394,919                   |
| 18-44        | 3,971 /44,415 (8.94%)                       | 2,010 /35,433 (5.67%) | 5,296,667                         | 3,476,975        | 8,773,642                 |
| 45-64        | 5,646 /50,422 (11.19%)                      | 2,631 /44,074 (5.97%) | 4,663,463                         | 2,444,903        | 7,108,365                 |
| ≥65          | 6,315 /67,810 (9.28%)                       | 3,213 /68,939 (4.66%) | 2,970,562                         | 1,208,255        | 4,178,817                 |
| <b>Total</b> |                                             |                       | <b>13,125,944</b>                 | <b>7,329,798</b> | <b>20,455,742 (6.14%)</b> |

**Date-window: 180**

| Age          | Autoimmune Disease Counts/ Denominators (%) |                      | Projected Prevalence <sup>a</sup> |                  |                           |
|--------------|---------------------------------------------|----------------------|-----------------------------------|------------------|---------------------------|
|              | Female                                      | Male                 | Female                            | Male             | Total                     |
| 0-17         | 14/2,747 (0.05%)                            | 15/3,135 (0.05%)     | 179,762                           | 177,290          | 357,053                   |
| 18-44        | 3,466/37,727 (9.19%)                        | 1,739/29,385 (5.92%) | 5,442,629                         | 3,627,332        | 9,069,961                 |
| 45-64        | 5,014/44,046 (11.38%)                       | 2,285/37,670 (6.07%) | 4,740,952                         | 2,484,356        | 7,225,308                 |
| ≥65          | 5,571/59,376 (9.38%)                        | 2,763/59,724 (4.63%) | 2,992,824                         | 1,199,347        | 4,192,171                 |
| <b>Total</b> |                                             |                      | <b>13,356,167</b>                 | <b>7,488,325</b> | <b>20,844,492 (6.25%)</b> |

**Date-window: 365**

| Age          | Autoimmune Disease Counts/ Denominators (%) |                       | Projected Prevalence <sup>a</sup> |                  |                           |
|--------------|---------------------------------------------|-----------------------|-----------------------------------|------------------|---------------------------|
|              | Female                                      | Male                  | Female                            | Male             | Total                     |
| 0-17         | 11/2,234 (0.05%)                            | 10/2,507 (0.04%)      | 173,676                           | 147,801          | 321,476                   |
| 18-44        | 2,773 /29,463 (9.41%)                       | 1,355 /22,357 (6.06%) | 5,575,776                         | 3,714,832        | 9,290,608                 |
| 45-64        | 4,209 /36,131 (11.65%)                      | 1,897 /30,100 (6.30%) | 4,851,618                         | 2,581,214        | 7,432,832                 |
| ≥65          | 4,646 /49,058 (9.47%)                       | 2,209 /48,502 (4.55%) | 3,020,844                         | 1,180,725        | 4,201,570                 |
| <b>Total</b> |                                             |                       | <b>13,621,915</b>                 | <b>7,624,572</b> | <b>21,246,487 (6.37%)</b> |

**Date-window: 720**

| Age          | Autoimmune Disease Counts/ Denominators (%) |                       | Projected Prevalence <sup>a</sup> |                  |                           |
|--------------|---------------------------------------------|-----------------------|-----------------------------------|------------------|---------------------------|
|              | Female                                      | Male                  | Female                            | Male             | Total                     |
| 0-17         | 5/1,548 (0.03%)                             | 4/1,723 (0.02%)       | 113,927                           | 86,021           | 199,949                   |
| 18-44        | 1,926 /20,109 (9.58%)                       | 966 /14,994 (6.44%)   | 5,674,116                         | 3,948,872        | 9,622,988                 |
| 45-64        | 3,221 /27,195 (11.84%)                      | 1,425 /21,900 (6.51%) | 4,932,753                         | 2,664,980        | 7,597,733                 |
| ≥65          | 3,532 /37,367 (9.45%)                       | 1,598 /35,801 (4.46%) | 3,015,029                         | 1,157,163        | 4,172,191                 |
| <b>Total</b> |                                             |                       | <b>13,735,825</b>                 | <b>7,857,036</b> | <b>21,592,861 (6.48%)</b> |

<sup>a</sup>Based-on US Census Data for 2022; sex and age adjusted

**Supplementary Table 7. Percent change using different date windows<sup>a</sup>**

| Date-Window | Prevalence <sup>b</sup> | Prevalence % US Population <sup>b</sup> | % Change |
|-------------|-------------------------|-----------------------------------------|----------|
| <b>0</b>    | 23,286,144              | 6.99%                                   |          |
| <b>30</b>   | 19,740,690              | 5.92%                                   | -17.96%  |
| <b>60</b>   | 20,178,353              | 6.05%                                   | 2.17%    |
| <b>90</b>   | 20,455,742              | 6.14%                                   | 1.36%    |
| <b>180</b>  | 20,844,492              | 6.25%                                   | 1.87%    |
| <b>365</b>  | 21,246,487              | 6.37%                                   | 1.89%    |
| <b>720</b>  | 21,592,861              | 6.48%                                   | 1.60%    |

<sup>a</sup>Sex and age adjusted; <sup>b</sup>data from Supplementary Table 6

**Supplementary Table 8. Validation of algorithm for rheumatoid arthritis (USC data)<sup>a</sup>**

| Algorithm <sup>b</sup>  | Site             | Numerator | Denominator | Projected US Prevalence | % Prevalence |
|-------------------------|------------------|-----------|-------------|-------------------------|--------------|
| <b>Harvard</b>          | USC <sup>a</sup> | 2,552     | 375,253     | 2,266,604               | 6.80%        |
| <b>Ours<sup>c</sup></b> | USC              | 2,912     | 375,253     | 2,586,344               | 7.76%        |
| <b>Ours</b>             | All 6 sites      | 80,984    | 10,461,368  | 2,580,060               | 7.74%        |

<sup>a</sup>Abbreviations: USC, University of Southern California; <sup>b</sup>Phenotype 585 (<https://phekb.org/phenotype/rheumatoid-arthritis-ra>); <sup>c</sup>Age adjusted, single site

## References

1. Collins PW, et al. Acquired hemophilia A in the United Kingdom: A 2-year national surveillance study by the United Kingdom Haemophilia Centre Doctors' Organisation. *Blood*. 2007;109(5):1870-1877.
2. Filippi M, Rocca, M.A. *Acute Disseminated Encephalomyelitis*. White Matter Diseases. Springer, Cham; 2020.
3. Wu MH, et al. Prevalence and the long-term coronary risks of patients with Kawasaki disease in a general population <40 years: A national database study. *Circ Cardiovasc Qual Outcomes*. 2012;5(4):566-750.
4. Tenembaum S, et al. Acute disseminated encephalomyelitis: a long-term follow-up study of 84 pediatric patients. *Neurology*. 2002;59(8):1224-1231.
5. Hansen DL, et al. Evans syndrome in adults - Incidence, prevalence, and survival in a nationwide cohort. *Am J Hematol*. 2019;94(10):1081-1090.
6. Olafsson AS, Sigurjonsdottir HA. Increasing prevalence of Addison Disease: Results from a nationwide study. *Endocr Pract*. 2016;22(1):30-35.
7. Mitrovic S, Feist E, Fautrel B, Eds. *Adult-Onset Still's Disease*. Periodic and Non-Periodic Fevers Rare Diseases of the Immune System. Springer, Cham; 2020.
8. Benigno M, et al. A large cross-sectional survey study of the prevalence of alopecia areata in the United States. *Clin Cosmet Investig Dermatol*. 2020;13:259-266.
9. Lingaraj U, et al. A "Mini-Epidemic" of anti-glomerular basement membrane disease: Clinical and epidemiological study. *Saudi J Kidney Dis Transpl*. 2017;28(5):1057-1063.
10. Berti A, et al. The epidemiology of antineutrophil cytoplasmic autoantibody-associated vasculitis in Olmsted County, Minnesota: A twenty-year US population-based study. *Arthritis Rheumatol*. 2017;69(12):2338-2350.
11. Samanta D, Lui F. Anti-NMDAR Encephalitis. *StatPearls*. 2023.
12. Gomez-Puerta JA, Cervera R. Diagnosis and classification of the antiphospholipid syndrome. *J Autoimmun*. 2014;48-49:20-25.

13. Cojocaru M, et al. New insights into antisynthetase syndrome. *Maedica (Bucur)*. 2016;11(2):130-135.
14. Vaht K, et al. Incidence and outcome of acquired aplastic anemia: Real-world data from patients diagnosed in Sweden from 2000-2011. *Haematologica*. 2017;102(10):1683-1690.
15. Jensen ET, et al. Prevalence of eosinophilic gastritis, gastroenteritis, and colitis: Estimates from a national administrative database. *J Pediatr Gastroenterol Nutr*. 2016;62(1):36-42.
16. Dubey D, et al. Autoimmune encephalitis epidemiology and a comparison to infectious encephalitis. *Ann Neurol*. 2018;83(1):166-177.
17. Ruemmele FM. *Chapter 85 - Autoimmune Enteropathy and IPEX Syndrome*. 4th ed. vol 2. Academic Press; 2015.
18. Boberg KM, et al. Incidence and prevalence of primary biliary cirrhosis, primary sclerosing cholangitis, and autoimmune hepatitis in a Norwegian population. *Scand J Gastroenterol*. 1998;33(1):99-103.
19. Vambutas A, Pathak S. AAO: Autoimmune and autoinflammatory (disease) in otology: What is new in immune-mediated hearing loss. *Laryngoscope Investig Otolaryngol*. 2016;1(5):110-115.
20. Shah S, et al. Autoimmune lymphoproliferative syndrome: An update and review of the literature. *Curr Allergy Asthma Rep*. 2014;14(9):462.
21. Tsigkou A, et al. High serum inhibin concentration discriminates autoimmune oophoritis from other forms of primary ovarian insufficiency. *J Clin Endocrinol Metab*. 2008;93(4):1263-1269.
22. Cai O, Tan S. From pathogenesis, clinical manifestation, and diagnosis to treatment: An overview on autoimmune pancreatitis. *Gastroenterol Res Pract*. 2017;2017:3246459.
23. Segal JB, Powe NR. Prevalence of immune thrombocytopenia: Analyses of administrative data. *J Thromb Haemost*. 2006;4(11):2377-2383.
24. Eaton WW, et al. The prevalence of 30 ICD-10 autoimmune diseases in Denmark. *Immunol Res*. 2010;47(1-3):228-231.
25. Zuberbier T, et al. Epidemiology of urticaria: A representative cross-sectional population survey. *Clin Exp Dermatol*. 2010;35(8):869-873.

26. Acharya NR, et al. Incidence and prevalence of uveitis: Results from the Pacific Ocular Inflammation Study. *JAMA Ophthalmol.* 2013;131(11):1405-1412.
27. Calamia KT, et al. Epidemiology and clinical characteristics of Behcet's disease in the US: A population-based study. *Arthritis Rheum.* 2009;61(5):600-604.
28. Kridin K, Ludwig RJ. The growing incidence of bullous pemphigoid: Overview and potential explanations. *Front Med (Lausanne).* 2018;5:220.
29. Gujral N, et al. Celiac disease: Prevalence, diagnosis, pathogenesis and treatment. *World J Gastroenterol.* 2012;18(42):6036-6059.
30. Rajabally YA, et al. Epidemiologic variability of chronic inflammatory demyelinating polyneuropathy with different diagnostic criteria: Study of a UK population. *Muscle Nerve.* 2009;39(4):432-438.
31. Tolaymat L, Hall MR. Cicatricial Pemphigoid. *StatPearls.* 2023.
32. Mullins M, et al. Cold agglutinin disease burden: A longitudinal analysis of anemia, medications, transfusions, and health care utilization. *Blood Adv.* 2017;1(13):839-848.
33. Dahlhamer JM, et al. Prevalence of inflammatory bowel disease among adults aged  $\geq 18$  years - United States, 2015. *MMWR Morb Mortal Wkly Rep.* 2016;65(42):1166-1169.
34. Gudmundsson G, et al. Epidemiology of organising pneumonia in Iceland. *Thorax.* 2006;61(9):805-808.
35. Gauzere L, et al. Epidemiology of systemic lupus erythematosus in Reunion Island, Indian Ocean: A case-series in adult patients from a University Hospital. *Rev Med Interne.* 2019;40(4):214-219. [Caracteristiques du lupus erythemateux systemique a La Reunion : etude retrospective en population adulte au CHU de Saint-Denis.]
36. Shields BE, et al. Prevalence of dermatitis herpetiformis within the iCureCeliac Patient-Powered Research Network- Patient characteristics and dietary counseling. *JAMA Dermatol.* 2020;156(12):1374-1376.
37. Bendewald MJ, et al. Incidence of dermatomyositis and clinically amyopathic dermatomyositis: A population-based study in Olmsted County, Minnesota. *Arch Dermatol.* 2010;146(1):26-30.

38. Mocellin R, et al. Hashimoto's encephalopathy: Epidemiology, pathogenesis and management. *CNS Drugs*. 2007;21(10):799-811.
39. Iranzo P, et al. Epidermolysis bullosa acquisita: A retrospective analysis of 12 patients evaluated in four tertiary hospitals in Spain. *Br J Dermatol*. 2014;171(5):1022-1030.
40. Honik G, et al. Incidence and prevalence of episcleritis and scleritis in Northern California. *Cornea*. 2013;32(12):1562-1566.
41. Calguneri M, et al. Extra-articular manifestations of rheumatoid arthritis: Results of a university hospital of 526 patients in Turkey. *Clin Exp Rheumatol*. 2006;24(3):305-308.
42. Fong M, et al. Pemphigoid Gestationis. *StatPearls*. 2023.
43. Crowson CS, Matteson EL. Contemporary prevalence estimates for giant cell arteritis and polymyalgia rheumatica, 2015. *Semin Arthritis Rheum*. 2017;47(2):253-256.
44. Mohammad AJ, et al. Prevalence of Wegener's granulomatosis, microscopic polyangiitis, polyarteritis nodosa and Churg-Strauss syndrome within a defined population in southern Sweden. *Rheumatology (Oxford)*. 2007;46(8):1329-1337.
45. Eaton WW, et al. Epidemiology of autoimmune diseases in Denmark. *J Autoimmun*. 2007;29(1):1-9.
46. Bartalena L, Tanda ML. Clinical practice. Graves' ophthalmopathy. *N Engl J Med*. 2009;360(10):994-1001.
47. Sejvar JJ, et al. Population incidence of Guillain-Barre syndrome: A systematic review and meta-analysis. *Neuroepidemiology*. 2011;36(2):123-133.
48. Schena FP, Nistor I. Epidemiology of IgA nephropathy: A global perspective. *Semin Nephrol*. 2018;38(5):435-442.
49. Piram M, Mahr A. Epidemiology of immunoglobulin A vasculitis (Henoch-Schonlein): Current state of knowledge. *Curr Opin Rheumatol*. 2013;25(2):171-178.
50. Oprita R, et al. Overview of IgG4 - related disease. *J Med Life*. 2017;10(4):203-207.

51. Greenberg SA. Inclusion body myositis: Clinical features and pathogenesis. *Nat Rev Rheumatol*. 2019;15(5):257-272.
52. Harrold LR, et al. Incidence and prevalence of juvenile idiopathic arthritis among children in a managed care population, 1996-2009. *J Rheumatol*. 2013;40(7):1218-25.
53. Abenroth DC, et al. Lambert-Eaton myasthenic syndrome: Epidemiology and therapeutic response in the national veterans affairs population. *Muscle Nerve*. 2017;56(3):421-426.
54. Melnick LE, et al. Lichen sclerosus among women in the United States. *Int J Womens Dermatol*. 2020;6(4):260-262.
55. Fortuna G, Marinkovich MP. Linear immunoglobulin A bullous dermatosis. *Clin Dermatol*. 2012;30(1):38-50.
56. Wang H, et al. A systematic review and meta-analysis of prevalence of biopsy-proven lupus nephritis. *Arch Rheumatol*. 2018;33(1):17-25.
57. Ramos-Casals M, et al. Vasculitis in systemic lupus erythematosus: Prevalence and clinical characteristics in 670 patients. *Medicine (Baltimore)*. 2006;85(2):95-104.
58. Gunnarsson R, et al. The prevalence and incidence of mixed connective tissue disease: A national multicentre survey of Norwegian patients. *Ann Rheum Dis*. 2011;70(6):1047-1051.
59. Wallin MT, et al. The prevalence of MS in the United States: A population-based estimate using health claims data. *Neurology*. 2019;92(10):e1029-e1040.
60. Keeseey JC. Clinical evaluation and management of myasthenia gravis. *Muscle Nerve*. 2004;29(4):484-505.
61. Hor JY, Fujihara K. Epidemiology of myelin oligodendrocyte glycoprotein antibody-associated disease: A review of prevalence and incidence worldwide. *Front Neurol*. 2023;14:1260358.
62. Scheer D, et al. Prevalence and incidence of narcolepsy in a US health care claims database, 2008-2010. *Sleep*. 2019;42(7):zsz091.

63. Arora A, et al. Incidence of leukocytoclastic vasculitis, 1996 to 2010: A population-based study in Olmsted County, Minnesota. *Mayo Clin Proc.* 2014;89(11):1515-2154.
64. Marrie RA, Gryba C. The incidence and prevalence of neuromyelitis optica: a systematic review. *Int J MS Care.* 2013;15(3):113-118.
65. Pranzatelli MR, et al. Demographic, clinical, and immunologic features of 389 children with Opsoclonus-Myoclonus Syndrome: A cross-sectional study. *Front Neurol.* 2017;8:468.
66. Vogrig A, et al. Epidemiology of paraneoplastic neurological syndromes: A population-based study. *J Neurol.* 2020;267(1):26-35.
67. Wertenteil S, et al. Prevalence estimates for pemphigus in the United States: A sex- and age-adjusted population analysis. *JAMA Dermatol.* 2019;155(5):627-629.
68. Toh BH, et al. Pernicious anemia. *N Engl J Med.* 1997;337(20):1441-1448.
69. Cheeti A, et al. Autoimmune Myopathies. *StatPearls.* 2023.
70. Miller RH, et al. The epidemiology of the postpericardiotomy syndrome: A common complication of cardiac surgery. *Am Heart J.* 1988;116(5 Pt 1):1323-1329.
71. Lu M, et al. Factors associated with prevalence and treatment of primary biliary cholangitis in United States Health Systems. *Clin Gastroenterol Hepatol.* 2018;16(8):1333-1341.e6.
72. Liang H, et al. Incidence, prevalence, and natural history of primary sclerosing cholangitis in the United Kingdom. *Medicine (Baltimore).* 2017;96(24):e7116.
73. Rachakonda TD, et al. Psoriasis prevalence among adults in the United States. *J Am Acad Dermatol.* 2014;70(3):512-516.
74. Hanova P, et al. Incidence and prevalence of psoriatic arthritis, ankylosing spondylitis, and reactive arthritis in the first descriptive population-based study in the Czech Republic. *Scand J Rheumatol.* 2010;39(4):310-317.
75. Kent PD, et al. Relapsing polychondritis. *Curr Opin Rheumatol.* 2004;16(1):56-61.
76. Lahiri S, Sanyahumbi A. Acute rheumatic fever. *Pediatr Rev.* 2021;42(5):221-232.

77. Tuncer T, et al. Prevalence of rheumatoid arthritis and spondyloarthritis in Turkey: A nationwide study. *Arch Rheumatol*. 2018;33(2):128-136.
78. Bartels C, et al. Decline in rheumatoid vasculitis prevalence among US veterans: A retrospective cross-sectional study. *Arthritis Rheum*. 2009;60(9):2553-2557.
79. Narvaez J, et al. Prevalence of Sjogren's syndrome in the general adult population in Spain: Estimating the proportion of undiagnosed cases. *Sci Rep*. 2020;10(1):10627.
80. Nguyen A, et al. Chronic intestinal pseudo-obstruction with dilated biliary tract as a spectrum of stiff person syndrome in a nondiabetic patient. *J Musculoskelet Neuronal Interact*. 2019;19(4):526-530.
81. Arevalo JF, et al. Update on sympathetic ophthalmia. *Middle East Afr J Ophthalmol*. 2012;19(1):13-21.
82. Izmirlly PM, et al. Prevalence of systemic lupus erythematosus in the United States: Estimates from a meta-analysis of the Centers for Disease Control and Prevention National Lupus Registries. *Arthritis Rheumatol*. 2021;73(6):991-996.
83. Barnes J, Mayes MD. Epidemiology of systemic sclerosis: Incidence, prevalence, survival, risk factors, malignancy, and environmental triggers. *Curr Opin Rheumatol*. 2012;24(2):165-170.
84. Holroyd KB, et al. Prevalence and characteristics of transverse myelitis and neuromyelitis optica spectrum disorders in the United Arab Emirates: A multicenter, retrospective study. *Clin Exp Neuroimmunol*. 2018;9(3):155-161.
85. Menke A, et al. The prevalence of type 1 diabetes in the United States. *Epidemiology*. 2013;24(5):773-774.
86. Zhang Y, et al. The prevalence of vitiligo: A meta-analysis. *PLoS One*. 2016;11(9):e0163806.
87. Lavezzo MM, et al. Vogt-Koyanagi-Harada disease: Review of a rare autoimmune disease targeting antigens of melanocytes. *Orphanet J Rare Dis*. 2016;11:29.
88. Cook JC, Gross GP. Adiposis Dolorosa. *StatPearls*. 2023.
89. Bakland G, et al. Incidence and prevalence of ankylosing spondylitis in Northern Norway. *Arthritis Rheum*. 2005;53(6):850-855.

90. Swanson TJ, Patel BC. Acquired Angioedema. *StatPearls*. 2023.
91. Chaudhari PM, Mukkamalla SKR. Autoimmune and Chronic Neutropenia. *StatPearls*. 2023.
92. Ohta R, Shimabukuro A. Parsonage-Turner syndrome in a patient with bilateral shoulder pain: A case report. *J Rural Med*. 2017;12(2):135-138.
93. Buch K, et al. Chronic non-bacterial osteomyelitis: A review. *Calcif Tissue Int*. 2019;104(5):544-553.
94. Sandroni P, et al. Complex regional pain syndrome type I: Incidence and prevalence in Olmsted county, a population-based study. *Pain*. 2003;103(1-2):199-207.
95. Di Raimondo C, et al. Cutaneous mastocytosis: A dermatological perspective. *Australas J Dermatol*. 2021;62(1):e1-e7.
96. Eisenberg VH, et al. Epidemiology of endometriosis: A large population-based database study from a healthcare provider with 2 million members. *BJOG*. 2018;125(1):55-62.
97. Moawad FJ. Eosinophilic esophagitis: Incidence and prevalence. *Gastrointest Endosc Clin N Am*. 2018;28(1):15-25.
98. Spielmann L, et al. Population-based prevalence of eosinophilic fasciitis (Shulman syndrome): A capture-recapture study. *Br J Dermatol*. 2018;179(2):516-517.
99. Requena L, Yus ES. Panniculitis. Part I. Mostly septal panniculitis. *J Am Acad Dermatol*. 2001;45(2):163-183; quiz 184-186.
100. Walitt B, et al. The prevalence and characteristics of fibromyalgia in the 2012 National Health Interview Survey. *PLoS One*. 2015;10(9):e0138024.
101. Calao M, et al. Hidradenitis suppurativa (HS) prevalence, demographics and management pathways in Australia: A population-based cross-sectional study. *PLoS One*. 2018;13(7):e0200683.
102. Raghu G, et al. Idiopathic pulmonary fibrosis in US Medicare beneficiaries aged 65 years and older: Incidence, prevalence, and survival, 2001-11. *Lancet Respir Med*. 2014;2(7):566-572.
103. Patnaik SS, et al. Etiology, pathophysiology and biomarkers of interstitial cystitis/painful bladder syndrome. *Arch Gynecol Obstet*. 2017;295(6):1341-1359.

104. Pardi DS, et al. The epidemiology of microscopic colitis: A population based study in Olmsted County, Minnesota. *Gut*. 2007;56(4):504-508.
105. Florez-Pollack S, et al. Morphea: Current concepts. *Clin Dermatol*. 2018;36(4):475-486.
106. Johnston S, et al. The prevalence of chronic fatigue syndrome/ myalgic encephalomyelitis: A meta-analysis. *Clin Epidemiol*. 2013;5:105-110.
107. Meyer A, et al. Incidence and prevalence of inflammatory myopathies: A systematic review. *Rheumatology (Oxford)*. 2015;54(1):50-63.
108. Jalbert JA, Chaudhari, U., Zhang, H., Weyne, J., Shammo, J.M. Epidemiology of PNH and real-world treatment patterns following an incident PNH diagnosis in the US. *Blood*. 2019;134(1):3407.
109. Gupta R, Patil H. Parry-Romberg syndrome with multiple intracranial cysts: A rare case report. *J Pediatr Neurosci*. 2016;11(2):145-149.
110. Wald ER, et al. Estimate of the incidence of PANDAS and PANS in 3 primary care populations. *Front Pediatr*. 2023;11:1170379.
111. Wang Y, et al. Characteristics of 1946 cases of POEMS Syndrome in Chinese subjects: A literature-based study. *Front Immunol*. 2019;10:1428.
112. Hernandez-Rodriguez J, et al. Diagnosis and classification of polyarteritis nodosa. *J Autoimmun*. 2014;48-49:84-89.
113. Codd MB, et al. Epidemiology of idiopathic dilated and hypertrophic cardiomyopathy. A population-based study in Olmsted County, Minnesota, 1975-1984. *Circulation*. 1989;80(3):564-572.
114. Ogdie A, Weiss P. The epidemiology of psoriatic arthritis. *Rheum Dis Clin North Am*. 2015;41(4):545-568.
115. Xu A, et al. Prevalence estimates for pyoderma gangrenosum in the United States: An age- and sex-adjusted population analysis. *J Am Acad Dermatol*. 2020;83(2):425-429.
116. Innes KE, et al. Prevalence of restless legs syndrome in North American and Western European populations: A systematic review. *Sleep Med*. 2011;12(7):623-634.

117. Uibu T, et al. Asbestos exposure as a risk factor for retroperitoneal fibrosis. *Lancet*. 2004;363(9419):1422-1426.
118. Baughman RP, et al. Sarcoidosis in America. Analysis based on health care use. *Ann Am Thorac Soc*. 2016;13(8):1244-1252.
119. de Koning HD. Schnitzler's syndrome: Lessons from 281 cases. *Clin Transl Allergy*. 2014;4:41.
120. Garner R, et al. Prevalence, risk factors and associations of primary Raynaud's phenomenon: Systematic review and meta-analysis of observational studies. *BMJ Open*. 2015;5(3):e006389.
121. Cahill TJ, et al. Challenges in infective endocarditis. *J Am Coll Cardiol*. 2017;69(3):325-344.
122. Watts R, et al. The epidemiology of Takayasu arteritis in the UK. *Rheumatology (Oxford)*. 2009;48(8):1008-1011.
123. Iaconetta G, et al. Tolosa-Hunt syndrome extending in the cerebello-pontine angle. *Cephalalgia*. 2005;25(9):746-750.
124. Spinillo A, et al. Undifferentiated connective tissue diseases and adverse pregnancy outcomes. An undervalued association? *Am J Reprod Immunol*. 2017;78(6) doi: 10.1111/aji.12762.
